# Supplementary material for: Electric field induced intra-molecular self-redox: superalkali Li3N3Mg as a candidate for NLO molecular switches
Source: Royal Society of Chemistry journal article supplement (doi:10.1039/d0cp03113e), 2020-01-01
Supplement: d0cp03113e1.pdf [file d0cp03113e1.pdf]

## **Electric Field Induced Intra-Molecular Self-Redox: Superalkali**

### **Li<sub>3</sub>N<sub>3</sub>Mg as Candidate for NLO Molecular Switches**

Xiu-Guang Yi,<sup>a</sup> Yin-Feng Wang,<sup>\*a</sup> Tian Qin,<sup>a</sup> Xue-Xia Liu,<sup>a</sup> Shu-Ling Jiang,<sup>a</sup> Jianguan Huang,<sup>a</sup> Kai Yang,<sup>a</sup> Jia Li,<sup>a</sup> and Zhi-Ru Li<sup>\*b</sup>

---

<sup>a</sup>Jiangxi Province Key Laboratory of Coordination Chemistry, Jinggangshan University, Ji'an, Jiangxi 343009 (P.R. China). E-mail:

*cyclont@yeah.net*

<sup>b</sup>Laboratory of Theoretical Computational Chemistry, Institute of Theoretical Chemistry, Jilin University, Changchun 130023 (P.R. China)

E-mail: *lzl@jlu.edu.cn*

## Contents

|                                                                                                                                                                                                                                                                                                                                                                                                                                                                                                            |     |
|------------------------------------------------------------------------------------------------------------------------------------------------------------------------------------------------------------------------------------------------------------------------------------------------------------------------------------------------------------------------------------------------------------------------------------------------------------------------------------------------------------|-----|
| Optimized Cartesian coordinates for $\text{Li}_3\text{N}_3\text{Mg}$ at the MP2/6-311+G(3df) level with and without OEEF .....                                                                                                                                                                                                                                                                                                                                                                             | S3  |
| <b>Table S1.</b> Total Energy ( $E_{\text{tot}}$ , au), Relative Energy ( $E_{\text{rel}}$ , kcal/mol), Energies of HOMOs ( $\epsilon_{\text{HOMO}}$ , in eV), and HOMO-LUMO Gaps ( $\epsilon_{\text{gap}}$ , in eV), Vertical Ionization Potential (VIP, in eV), Natural Popular Analysis Charge (NPA, $Q_{\text{Li3 ring}}$ and $Q_{\text{Mg}}$ ,  e ) of $\text{Li}_3\text{N}_3\text{Mg}$ at CCSD(T)/6-311+G(3df)//MP2/6-311+G(3df) level in presence and absence of OEEF ( $F_z \times 10^{-4}$ )..... | S8  |
| <b>Table S2.</b> $T_1$ diagnostics for the energies of both field-free $\text{Li}_3^{2+}\text{N}_3^{3-}\text{Mg}^+$ and $\text{Li}_3^+\text{N}_3^{3-}\text{Mg}^{2+}$ under $F_z$ of -0.0086 or -0.0100 au obtained at CCSD(T)/6-311+G(3df) level.....                                                                                                                                                                                                                                                      | S9  |
| <b>Table S3.</b> Dipole moment ( $\mu_0(F)$ ), Static First Hyperpolarizabilities ( $\beta_0(F)$ ) at MP2/6-311+G(3df) level, Dipole Moment between Ground State and Crucial Excited State ( $\Delta\mu_0$ ), Oscillator Strength $f_0$ , and Transition energy ( $\Delta E$ ) of Crucial Excited States of $\text{Li}_3\text{N}_3\text{Mg}$ in presence of OEEF ( $F_z \times 10^{-4}$ ) of $\text{Li}_3\text{N}_3\text{Mg}$ at the TD-M06-2X/6-311+G(3df) level.....                                     | S10 |
| <b>Table S4.</b> Total Energy ( $E_{\text{tot}}$ , au), Relative Energy ( $E_{\text{rel}}$ , kcal/mol), Energies of HOMOs ( $\epsilon_{\text{HOMO}}$ , in eV), and HOMO-LUMO Gaps ( $\epsilon_{\text{gap}}$ , in eV), Vertical Ionization Potential (VIP, in eV), Natural Popular Analysis Charge (NPA, $Q_{\text{Li3 ring}}$ and $Q_{\text{Be}}$ ,  e ) of $\text{Li}_3\text{N}_3\text{Be}$ in presence of OEEF ( $F_z \times 10^{-4}$ ) at MP2/6-311+G(3df) level.....                                   | S11 |
| <b>Table S5.</b> Total Energy ( $E_{\text{tot}}$ , au), Relative Energy ( $E_{\text{rel}}$ , kcal/mol), Energies of HOMOs ( $\epsilon_{\text{HOMO}}$ , in eV), and HOMO-LUMO Gaps ( $\epsilon_{\text{gap}}$ , in eV), Vertical Ionization Potential (VIP, in eV), Natural Popular Analysis Charge (NPA, $Q_{\text{Li3 ring}}$ and $Q_{\text{Ca}}$ ,  e ) of $\text{Li}_3\text{N}_3\text{Ca}$ in presence of OEEF ( $F_z \times 10^{-4}$ ) at MP2/6-311+G(3df) level.....                                   | S12 |
| <b>Table S6.</b> Dipole moment ( $\mu_0$ ), Static First Hyperpolarizabilities ( $\beta_0$ ) of $\text{Li}_3\text{N}_3\text{Be}$ and $\text{Li}_3\text{N}_3\text{Ca}$ in presence of OEEF ( $F_z \times 10^{-4}$ ) at MP2/6-311+G(3df) level. ....                                                                                                                                                                                                                                                         | S13 |

|                                   |                    |             |             |
|-----------------------------------|--------------------|-------------|-------------|
| Li <sub>3</sub> N <sub>3</sub> Mg |                    |             |             |
|                                   | $F_z = 0.0000$ au  |             |             |
| Li                                | -0.6474027         | -1.39037866 | 1.69577348  |
| Li                                | 1.53229778         | 0.13573683  | 1.69190155  |
| Li                                | -0.88156587        | 1.2576162   | 1.69314341  |
| N                                 | 0.51371096         | -0.73422422 | 0.22892741  |
| N                                 | 0.37746219         | 0.81213662  | 0.22888524  |
| N                                 | -0.89330421        | -0.0793265  | 0.22802115  |
| Mg                                | 0.00041082         | 0.0000813   | -1.67027432 |
|                                   | $F_z = -0.0010$ au |             |             |
| Li                                | -0.651602          | -1.400138   | 1.686254    |
| Li                                | 1.541369           | 0.136551    | 1.6832      |
| Li                                | -0.887245          | 1.266262    | 1.684413    |
| N                                 | 0.51381            | -0.733404   | 0.238131    |
| N                                 | 0.37756            | 0.811793    | 0.237714    |
| N                                 | -0.892225          | -0.078894   | 0.237977    |
| Mg                                | -0.000058          | -0.000528   | -1.671311   |
|                                   | $F_z = -0.0020$ au |             |             |
| Li                                | -0.6563            | -1.410098   | 1.676706    |
| Li                                | 1.552462           | 0.137487    | 1.673457    |
| Li                                | -0.893678          | 1.275263    | 1.674786    |
| N                                 | 0.51345            | -0.732938   | 0.247951    |
| N                                 | 0.377294           | 0.811263    | 0.247567    |
| N                                 | -0.891644          | -0.078852   | 0.247752    |
| Mg                                | 0.000025           | -0.000484   | -1.671841   |
|                                   | $F_z = -0.0030$ au |             |             |
| Li                                | -0.661493          | -1.421125   | 1.666782    |
| Li                                | 1.564711           | 0.138524    | 1.663329    |
| Li                                | -0.900786          | 1.285224    | 1.664783    |
| N                                 | 0.513106           | -0.732484   | 0.258011    |
| N                                 | 0.377041           | 0.810753    | 0.257655    |
| N                                 | -0.891078          | -0.078808   | 0.257772    |
| Mg                                | 0.000107           | -0.000443   | -1.671954   |
|                                   | $F_z = -0.0040$ au |             |             |
| Li                                | -0.667036          | -1.432927   | 1.656935    |
| Li                                | 1.577773           | 0.139638    | 1.653315    |
| Li                                | -0.908358          | 1.295878    | 1.654868    |
| N                                 | 0.512824           | -0.732095   | 0.267877    |
| N                                 | 0.376835           | 0.810328    | 0.267545    |
| N                                 | -0.890593          | -0.078765   | 0.267606    |
| Mg                                | 0.000164           | -0.000415   | -1.671768   |
|                                   | $F_z = -0.0050$ au |             |             |
| Li                                | -0.673061          | -1.445907   | 1.646137    |
| Li                                | 1.591906           | 0.140876    | 1.642614    |
| Li                                | -0.916536          | 1.307547    | 1.64408     |

|                    |           |           |           |
|--------------------|-----------|-----------|-----------|
| N                  | 0.512924  | -0.732107 | 0.277651  |
| N                  | 0.376925  | 0.810426  | 0.277292  |
| N                  | -0.89062  | -0.078731 | 0.277415  |
| Mg                 | 0.000071  | -0.000462 | -1.668811 |
| $F_z = -0.0060$ au |           |           |           |
| Li                 | -0.678969 | -1.458521 | 1.63595   |
| Li                 | 1.605841  | 0.142074  | 1.632288  |
| Li                 | -0.924599 | 1.318931  | 1.633829  |
| N                  | 0.512881  | -0.732057 | 0.286355  |
| N                  | 0.376896  | 0.810378  | 0.286017  |
| N                  | -0.890556 | -0.078725 | 0.28609   |
| Mg                 | 0.000115  | -0.000439 | -1.664151 |
| $F_z = -0.0070$ au |           |           |           |
| Li                 | -0.684197 | -1.46973  | 1.627289  |
| Li                 | 1.618161  | 0.143147  | 1.623578  |
| Li                 | -0.931717 | 1.329041  | 1.625141  |
| N                  | 0.512989  | -0.732189 | 0.292421  |
| N                  | 0.376977  | 0.810541  | 0.292086  |
| N                  | -0.890723 | -0.078731 | 0.292152  |
| Mg                 | 0.00012   | -0.000437 | -1.656289 |
| $F_z = -0.0072$ au |           |           |           |
| Li                 | -0.685551 | -1.472706 | 1.625344  |
| Li                 | 1.621318  | 0.143433  | 1.621753  |
| Li                 | -0.933543 | 1.331707  | 1.623225  |
| N                  | 0.513059  | -0.732205 | 0.293276  |
| N                  | 0.377037  | 0.810598  | 0.292915  |
| N                  | -0.890751 | -0.078716 | 0.293047  |
| Mg                 | 0.000039  | -0.000470 | -1.653182 |
| $F_z = -0.0074$ au |           |           |           |
| Li                 | -0.686060 | -1.473839 | 1.624455  |
| Li                 | 1.622505  | 0.143547  | 1.620920  |
| Li                 | -0.934225 | 1.332724  | 1.622357  |
| N                  | 0.513129  | -0.732275 | 0.293439  |
| N                  | 0.377090  | 0.810686  | 0.293065  |
| N                  | -0.890839 | -0.078717 | 0.293233  |
| Mg                 | 0.000010  | -0.000485 | -1.651092 |
| $F_z = -0.0076$ au |           |           |           |
| Li                 | -0.687372 | -1.476660 | 1.623406  |
| Li                 | 1.625585  | 0.143820  | 1.619895  |
| Li                 | -0.935996 | 1.335252  | 1.621297  |
| N                  | 0.513275  | -0.732455 | 0.293239  |
| N                  | 0.377209  | 0.810911  | 0.292855  |
| N                  | -0.891069 | -0.078733 | 0.293031  |
| Mg                 | -0.000023 | -0.000494 | -1.647344 |

$F_z = -0.0078$  au

|    |           |           |           |
|----|-----------|-----------|-----------|
| Li | -0.686863 | -1.475575 | 1.623395  |
| Li | 1.624403  | 0.143716  | 1.619846  |
| Li | -0.935321 | 1.334296  | 1.621306  |
| N  | 0.513335  | -0.732573 | 0.292673  |
| N  | 0.377236  | 0.811016  | 0.292297  |
| N  | -0.891204 | -0.078745 | 0.292475  |
| Mg | 0.000022  | -0.000493 | -1.645615 |

$F_z = -0.0080$  au

|    |           |           |           |
|----|-----------|-----------|-----------|
| Li | -0.686327 | -1.474461 | 1.624318  |
| Li | 1.623161  | 0.143605  | 1.620758  |
| Li | -0.934617 | 1.333316  | 1.622264  |
| N  | 0.513415  | -0.732708 | 0.290696  |
| N  | 0.37728   | 0.811148  | 0.290324  |
| N  | -0.891351 | -0.078753 | 0.290517  |
| Mg | 0.000048  | -0.000506 | -1.642499 |

$F_z = -0.0082$  au

|    |           |           |           |
|----|-----------|-----------|-----------|
| Li | -0.685933 | -1.473694 | 1.62606   |
| Li | 1.622208  | 0.143534  | 1.622617  |
| Li | -0.934069 | 1.332617  | 1.624058  |
| N  | 0.513629  | -0.732948 | 0.287356  |
| N  | 0.377439  | 0.811441  | 0.286956  |
| N  | -0.891646 | -0.078762 | 0.287219  |
| Mg | -0.000018 | -0.000546 | -1.637888 |

$F_z = -0.0084$  au

|    |           |           |           |
|----|-----------|-----------|-----------|
| Li | -0.684856 | -1.471478 | 1.629451  |
| Li | 1.619631  | 0.143321  | 1.626152  |
| Li | -0.932594 | 1.330609  | 1.627518  |
| N  | 0.513918  | -0.733277 | 0.2822    |
| N  | 0.377655  | 0.811841  | 0.281763  |
| N  | -0.892044 | -0.078776 | 0.282117  |
| Mg | -0.000102 | -0.000599 | -1.632824 |

$F_z = -0.0085$  au

|    |           |           |           |
|----|-----------|-----------|-----------|
| Li | -0.683061 | -1.46772  | 1.632146  |
| Li | 1.615343  | 0.142993  | 1.629108  |
| Li | -0.930062 | 1.327159  | 1.630232  |
| N  | 0.514237  | -0.733625 | 0.279132  |
| N  | 0.377922  | 0.812276  | 0.278642  |
| N  | -0.892515 | -0.078815 | 0.279106  |
| Mg | -0.000255 | -0.000626 | -1.631987 |

$F_z = -0.0086$  au

|    |           |           |          |
|----|-----------|-----------|----------|
| Li | -0.681639 | -1.464726 | 1.635825 |
| Li | 1.611975  | 0.142703  | 1.632858 |
| Li | -0.928129 | 1.324459  | 1.633956 |

|                    |           |           |           |
|--------------------|-----------|-----------|-----------|
| N                  | 0.514402  | -0.733821 | 0.274546  |
| N                  | 0.378041  | 0.812507  | 0.274035  |
| N                  | -0.892748 | -0.078823 | 0.274549  |
| Mg                 | -0.000293 | -0.000657 | -1.629391 |
| $F_z = -0.0088$ au |           |           |           |
| Li                 | -0.676865 | -1.454652 | 1.645339  |
| Li                 | 1.600634  | 0.141757  | 1.642678  |
| Li                 | -0.921566 | 1.31533   | 1.643574  |
| N                  | 0.51498   | -0.734504 | 0.262887  |
| N                  | 0.378479  | 0.813313  | 0.262301  |
| N                  | -0.893594 | -0.078874 | 0.262993  |
| Mg                 | -0.000459 | -0.000729 | -1.623393 |
| $F_z = -0.0090$ au |           |           |           |
| Li                 | -0.67031  | -1.440717 | 1.660516  |
| Li                 | 1.585103  | 0.14043   | 1.658079  |
| Li                 | -0.912603 | 1.302731  | 1.658843  |
| N                  | 0.515587  | -0.735261 | 0.245489  |
| N                  | 0.378938  | 0.814186  | 0.244835  |
| N                  | -0.894526 | -0.07894  | 0.245679  |
| Mg                 | -0.00058  | -0.000787 | -1.617064 |
| $F_z = -0.0092$ au |           |           |           |
| Li                 | -0.663865 | -1.426396 | 1.677604  |
| Li                 | 1.570505  | 0.139058  | 1.674323  |
| Li                 | -0.90404  | 1.290039  | 1.675589  |
| N                  | 0.515553  | -0.735987 | 0.227331  |
| N                  | 0.378829  | 0.814586  | 0.226984  |
| N                  | -0.895374 | -0.079202 | 0.227107  |
| Mg                 | 0         | -0.000457 | -1.612561 |
| $F_z = -0.0094$ au |           |           |           |
| Li                 | -0.661484 | -1.421356 | 1.686822  |
| Li                 | 1.564905  | 0.138575  | 1.683632  |
| Li                 | -0.900801 | 1.285494  | 1.684836  |
| N                  | 0.515586  | -0.736004 | 0.217145  |
| N                  | 0.378853  | 0.814615  | 0.216787  |
| N                  | -0.895396 | -0.079197 | 0.216948  |
| Mg                 | -0.000054 | -0.000485 | -1.609793 |
| $F_z = -0.0096$ au |           |           |           |
| Li                 | -0.657542 | -1.4133   | 1.697273  |
| Li                 | 1.555239  | 0.137821  | 1.694733  |
| Li                 | -0.895275 | 1.278086  | 1.69555   |
| N                  | 0.515893  | -0.73595  | 0.206165  |
| N                  | 0.379127  | 0.814781  | 0.205588  |
| N                  | -0.895363 | -0.079085 | 0.206268  |
| Mg                 | -0.000471 | -0.000711 | -1.609198 |

$F_z = -0.0098$  au

|    |             |             |             |
|----|-------------|-------------|-------------|
| Li | -0.65780800 | -1.41351300 | 1.70006600  |
| Li | 1.55626800  | 0.13783500  | 1.69696800  |
| Li | -0.89578800 | 1.27842400  | 1.69811000  |
| N  | 0.51549300  | -0.73587100 | 0.20323400  |
| N  | 0.37878300  | 0.81445700  | 0.20286700  |
| N  | -0.89523900 | -0.07918600 | 0.20305000  |
| Mg | -0.00010000 | -0.00050400 | -1.60791700 |

$F_z = -0.0100$  au

|    |           |           |           |
|----|-----------|-----------|-----------|
| Li | -0.656692 | -1.411101 | 1.703536  |
| Li | 1.553679  | 0.137589  | 1.700387  |
| Li | -0.894295 | 1.276256  | 1.701523  |
| N  | 0.515398  | -0.735762 | 0.199739  |
| N  | 0.378716  | 0.814326  | 0.199393  |
| N  | -0.895108 | -0.079186 | 0.199545  |
| Mg | -0.000088 | -0.000481 | -1.607745 |

$\text{Li}_3\text{N}_3\text{Be}$   $F_z = 0.0000$  au

|    |             |             |             |
|----|-------------|-------------|-------------|
| Li | -1.50291100 | 0.56032800  | 1.19868800  |
| Li | 0.26535500  | -1.58144300 | 1.19950500  |
| Li | 1.23637000  | 1.02037500  | 1.20046800  |
| N  | -0.68906200 | -0.56900500 | -0.19673900 |
| N  | 0.83715700  | -0.31226800 | -0.19586400 |
| N  | -0.14818100 | 0.88118500  | -0.19550500 |
| Be | 0.00104100  | 0.00070800  | -1.66980700 |

$\text{Li}_3\text{N}_3\text{Ca}$   $F_z = 0.0000$  au

|    |           |           |           |
|----|-----------|-----------|-----------|
| Li | 1.487491  | -0.464501 | -2.02321  |
| Li | -0.341958 | 1.522742  | -2.020811 |
| Li | -1.147001 | -1.056356 | -2.022203 |
| N  | 0.650877  | 0.59902   | -0.588732 |
| N  | -0.844201 | 0.263432  | -0.588794 |
| N  | 0.19401   | -0.863319 | -0.588662 |
| Ca | -0.00002  | 0.000021  | 1.5281    |

**Table S1.** Total Energy ( $E_{\text{tot}}$ , au), Relative Energy ( $E_{\text{rel}}$ , kcal/mol), Energies of HOMOs ( $\epsilon_{\text{HOMO}}$ , in eV), and HOMO-LUMO Gaps ( $\epsilon_{\text{gap}}$ , in eV), Vertical Ionization Potential (VIP, in eV), Natural Popular Analysis Charge (NPA,  $Q_{\text{Li3 ring}}$  and  $Q_{\text{Mg}}$ , |e|) of  $\text{Li}_3\text{N}_3\text{Mg}$  at CCSD(T)/6-311+G(3df)/MP2/6-311+G(3df) level in presence and absence of OEEF ( $F_z \times 10^{-4}$ )

| Field | $E_{\text{tot}}$ | $E_{\text{rel}}$ | $\epsilon_{\text{HOMO}}$ | $\epsilon_{\text{gap}}$ | VIP  | $Q_{\text{Li3}}$ | $Q_{\text{Mg}}$ |
|-------|------------------|------------------|--------------------------|-------------------------|------|------------------|-----------------|
| 0     | -386.0114        | 0.000            | -3.641                   | 2.630                   | 5.30 | 1.697            | 0.804           |
| -10   | -386.0102        | -0.721           | -3.579                   | 2.618                   | 5.25 | 1.628            | 0.875           |
| -20   | -386.0095        | -1.179           | -3.527                   | 2.601                   | 5.21 | 1.562            | 0.949           |
| -30   | -386.0092        | -1.367           | -3.486                   | 2.576                   | 5.19 | 1.494            | 1.021           |
| -40   | -386.0094        | -1.237           | -3.460                   | 2.539                   | 5.15 | 1.423            | 1.096           |
| -50   | -386.0102        | -0.698           | -3.452                   | 2.484                   | 5.11 | 1.347            | 1.178           |
| -60   | -386.0121        | 0.460            | -3.469                   | 2.413                   | 5.08 | 1.264            | 1.266           |
| -70   | -386.0155        | 2.620            | -3.517                   | 2.340                   | 5.05 | 1.179            | 1.367           |
| -72   | -386.0165        | 3.222            | -3.531                   | 2.327                   | 5.05 | 1.158            | 1.389           |
| -80   | -386.0218        | 6.583            | -3.602                   | 2.294                   | 5.05 | 1.068            | 1.483           |
| -82   | -386.0237        | 7.726            | -3.624                   | 2.295                   | 5.04 | 1.040            | 1.512           |
| -84   | -386.0255        | 8.857            | -3.647                   | 2.300                   | 5.03 | 1.008            | 1.544           |
| -85   | -386.0262        | 9.312            | -3.661                   | 2.305                   | 5.02 | 0.993            | 1.559           |
| -86   | -386.0267        | 9.650            | -3.675                   | 2.314                   | 5.00 | 0.974            | 1.578           |
| -87   | -386.0267        | 9.629            | -3.690                   | 2.326                   | 4.96 | 0.940            | 1.593           |
| -88   | -386.0257        | 8.984            | -3.705                   | 2.342                   | 4.89 | 0.926            | 1.614           |
| -90   | -386.0180        | 4.179            | -3.741                   | 2.391                   | 4.60 | 0.875            | 1.657           |
| -92   | -386.0071        | -2.643           | -3.781                   | 2.451                   | 4.23 | 0.832            | 1.696           |
| -94   | -386.0032        | -5.126           | -3.817                   | 2.492                   | 4.08 | 0.808            | 1.718           |
| -95   | -386.0023        | -5.666           | -3.839                   | 2.521                   | 4.04 | 0.794            | 1.729           |
| -96   | -386.0025        | -5.556           | -3.858                   | 2.536                   | 4.03 | 0.787            | 1.736           |
| -98   | -386.0037        | -4.786           | -3.892                   | 2.552                   | 4.03 | 0.779            | 1.744           |
| -100  | -386.0054        | -3.719           | -3.929                   | 2.567                   | 4.04 | 0.771            | 1.751           |



**Table S2.**  $T_1$  diagnostics for the energies of both field-free  $\text{Li}_3^{2+}\text{N}_3^3\text{-Mg}^+$  and  $\text{Li}_3^+\text{N}_3^3\text{-Mg}^{2+}$  under  $F_z$  of -0.0086 or -0.0100 au obtained at CCSD(T)/6-311+G(3df) level

|                  | $\text{Li}_3^{2+}\text{N}_3^3\text{-Mg}^+$ | $\text{Li}_3^+\text{N}_3^3\text{-Mg}^{2+}$ |                 |
|------------------|--------------------------------------------|--------------------------------------------|-----------------|
|                  |                                            | $F_z = -0.0086$                            | $F_z = -0.0100$ |
| $T_1$ diagnostic | 0.0448                                     | 0.1390                                     | 0.390           |

**Table S3.** Dipole moment ( $\mu_0(F)$ ), Static First Hyperpolarizabilities ( $\beta_0(F)$ ) at MP2/6-311+G(3df) level, Dipole Moment between Ground State and Crucial Excited State ( $\Delta\mu_0$ ), Oscillator Strength  $f_0$ , and Transition energy ( $\Delta E$ ) of Crucial Excited States of  $\text{Li}_3\text{N}_3\text{Mg}(n)$  in presence of OEEF ( $F_z \times 10^{-4}$ ) of  $\text{Li}_3\text{N}_3\text{Mg}$  at the TD-M06-2X/6-311+G(3df) level

| $\text{Li}_3\text{N}_3\text{Mg}(n)$ | $\mu_0(F)$<br>[au] | $\mu_z(F)$<br>[au] | $\beta_{zzz}(F)$<br>[au] | $\beta_0(F)$<br>[au] | $\Delta\mu_z(F)$<br>[au] | $\Delta E$ [eV] | $f_0$  | Major<br>Contribution |
|-------------------------------------|--------------------|--------------------|--------------------------|----------------------|--------------------------|-----------------|--------|-----------------------|
| n = 0                               | 0.742              | 0.742              | -52297                   | 34986                | 3.041                    | 0.9609          | 0.2179 | H → L                 |
| n = 10                              | 0.534              | 0.533              | -77699                   | 51958                | 3.041                    | 0.9609          | 0.2179 | H → L                 |
| n = 20                              | 0.336              | 0.336              | -103847                  | 69355                | 3.034                    | 0.9531          | 0.2148 | H → L                 |
| n = 30                              | 0.158              | 0.158              | -130046                  | 86692                | 3.035                    | 0.9438          | 0.2129 | H → L                 |
| n = 40                              | 0.012              | 0.011              | -155115                  | 103164               | 3.052                    | 0.9325          | 0.2128 | H → L                 |
| n = 50                              | -0.095             | -0.095             | -177516                  | 117790               | 3.097                    | 0.9185          | 0.2158 | H → L                 |
| n = 60                              | -0.158             | -0.158             | -195609                  | 129544               | 3.202                    | 0.8995          | 0.2259 | H → L                 |
| n = 70                              | -0.172             | -0.172             | -205391                  | 135994               | 3.430                    | 0.8673          | 0.2500 | H → L                 |
| n = 72                              | -0.166             | -0.166             | -205872                  | 136397               | 3.579                    | 0.8431          | 0.2645 | H → L                 |
| n = 80                              | -0.109             | -0.109             | -194717                  | 129571               | 3.757                    | 0.8148          | 0.2818 | H → L                 |
| n = 82                              | -0.064             | -0.064             | -185073                  | 123489               | 3.861                    | 0.7996          | 0.2921 | H → L                 |
| n = 84                              | 0.006              | 0.006              | -170878                  | 114385               | 4.000                    | 0.7768          | 0.3047 | H → L                 |
| n = 86                              | 0.107              | 0.107              | -150817                  | 101225               | 4.075                    | 0.7629          | 0.3106 | H → L                 |

<sup>a</sup> H for HOMO, L for LUMO

**Table S4.** Total Energy ( $E_{\text{tot}}$ , au), Relative Energy ( $E_{\text{rel}}$ , kcal/mol), Energies of HOMOs ( $\epsilon_{\text{HOMO}}$ , in eV), and HOMO-LUMO Gaps ( $\epsilon_{\text{gap}}$ , in eV), Vertical Ionization Potential (VIP, in eV), Natural Popular Analysis Charge (NPA,  $Q_{\text{Li3 ring}}$  and  $Q_{\text{Be}}$ , |e|) of  $\text{Li}_3\text{N}_3\text{Be}$  under OEEF ( $F_z \times 10^{-4}$ ) at MP2/6-311+G(3df) level.

| Field | $E_{\text{tot}}$ | $E_{\text{rel}}$ | $\epsilon_{\text{HOMO}}$ | $\epsilon_{\text{gap}}$ | VIP   | $Q_{\text{Li3}}$ | $Q_{\text{Be}}$ |
|-------|------------------|------------------|--------------------------|-------------------------|-------|------------------|-----------------|
| 0     | -200.9881        | 0.000            | -3.684                   | -2.891                  | 6.086 | 1.448            | 0.819           |
| -5    | -200.9866        | -0.919           | -3.704                   | -2.893                  | 4.788 | 1.405            | 0.859           |
| -10   | -200.9851        | -1.842           | -3.726                   | -2.895                  | 4.775 | 1.353            | 0.906           |
| -15   | -200.9837        | -2.757           | -3.748                   | -2.897                  | 4.826 | 1.312            | 0.944           |
| -20   | -200.9825        | -3.500           | -3.746                   | -2.887                  | 4.842 | 1.319            | 0.946           |
| -25   | -200.9812        | -4.304           | -3.767                   | -2.884                  | 4.802 | 1.285            | 0.977           |
| -30   | -200.9800        | -5.063           | -3.793                   | -2.882                  | 4.752 | 1.285            | 0.977           |
| -35   | -200.9789        | -5.761           | -3.822                   | -2.882                  | 4.684 | 1.494            | 1.021           |
| -40   | -200.9779        | -6.362           | -3.860                   | -2.890                  | 4.590 | 1.423            | 1.096           |
| -41   | -200.9778        | -6.464           | -3.869                   | -2.893                  | 4.566 | 1.122            | 1.118           |
| -42   | -200.9776        | -6.557           | -3.881                   | -2.903                  | 4.522 | 1.096            | 1.137           |
| -43   | -200.9775        | -6.637           | -3.892                   | -2.909                  | 4.493 | 1.077            | 1.151           |
| -44   | -200.9774        | -6.700           | -3.902                   | -2.918                  | 4.460 | 1.057            | 1.166           |
| -45   | -200.9784        | -6.067           | -4.091                   | -3.362                  | 4.228 | 0.824            | 1.282           |
| -50   | -200.9803        | -4.865           | -4.168                   | -3.447                  | 4.284 | 0.811            | 1.289           |
| -55   | -200.9824        | -3.545           | -4.239                   | -3.414                  | 4.340 | 0.804            | 1.294           |
| -60   | -200.9847        | -2.136           | -4.310                   | -3.342                  | 4.398 | 0.798            | 1.299           |
| -65   | -200.9870        | -0.650           | -4.380                   | -3.264                  | 4.455 | 0.795            | 1.304           |
| -70   | -200.9895        | 0.910            | -4.455                   | -3.188                  | 6.396 | 0.792            | 1.308           |
| -75   | -200.9921        | 2.543            | -4.530                   | -3.114                  | 4.574 | 0.784            | 1.319           |
| -80   | -200.9949        | 4.254            | -4.610                   | -3.044                  | 4.636 | 0.781            | 1.324           |
| -85   | -200.9977        | 6.048            | -4.693                   | -2.978                  | 4.699 | 0.780            | 1.329           |
| -90   | -201.0007        | 7.937            | -4.781                   | -2.918                  | 4.766 | 0.778            | 1.335           |
| -95   | -201.0039        | 9.928            | -4.873                   | -2.864                  | 4.834 | 0.777            | 1.341           |
| -100  | -200.9772        | -6.811           | -4.029                   | -3.300                  | 4.183 | 0.834            | 1.270           |

**Table S5.** Total Energy ( $E_{\text{tot}}$ , au), Relative Energy ( $E_{\text{rel}}$ , kcal/mol), Energies of HOMOs ( $\epsilon_{\text{HOMO}}$ , in eV), and HOMO-LUMO Gaps ( $\epsilon_{\text{gap}}$ , in eV), Vertical Ionization Potential (VIP, in eV), Natural Popular Analysis Charge (NPA,  $Q_{\text{Li3 ring}}$  and  $Q_{\text{Ca}}$ , |e|) of  $\text{Li}_3\text{N}_3\text{Ca}$  in presence of OEEF ( $F_z \times 10^{-4}$ ) at MP2/6-311+G(3df) level.

| Field | $E_{\text{tot}}$ | $E_{\text{rel}}$ | $\epsilon_{\text{HOMO}}$ | $\epsilon_{\text{gap}}$ | VIP   | $Q_{\text{Li3}}$ | $Q_{\text{Ca}}$ |
|-------|------------------|------------------|--------------------------|-------------------------|-------|------------------|-----------------|
| 0     | -863.3706        | 0.000            | -3.195                   | -2.311                  | 3.896 | 1.342            | 1.190           |
| -5    | -863.3699        | -0.445           | -3.205                   | -2.317                  | 3.854 | 1.288            | 1.245           |
| -10   | -863.3693        | -0.833           | -3.217                   | -2.322                  | 3.809 | 1.233            | 1.297           |
| -15   | -863.3688        | -1.142           | -3.234                   | -2.327                  | 3.761 | 1.173            | 1.356           |
| -20   | -863.3685        | -1.337           | -3.256                   | -2.332                  | 3.708 | 1.108            | 1.420           |
| -25   | -863.3685        | -1.362           | -3.285                   | -2.340                  | 3.650 | 1.035            | 1.490           |
| 30    | -863.3689        | -1.109           | -3.324                   | -2.357                  | 3.584 | 0.958            | 1.562           |
| -31   | -863.3690        | -1.007           | -3.334                   | -2.363                  | 3.573 | 0.938            | 1.579           |
| -32   | -863.3692        | -0.880           | -3.345                   | -2.370                  | 3.560 | 0.917            | 1.598           |
| -33   | -863.3695        | -0.725           | -3.358                   | -2.381                  | 3.548 | 0.898            | 1.616           |
| -34   | -863.3698        | -0.536           | -3.372                   | -2.395                  | 3.539 | 0.872            | 1.636           |
| -35   | -863.3706        | -0.052           | -3.400                   | -2.421                  | 3.538 | 0.836            | 1.662           |
| -36   | -863.3706        | -0.038           | -3.408                   | -2.439                  | 3.534 | 0.820            | 1.672           |
| -37   | -863.3711        | 0.272            | -3.428                   | -2.467                  | 3.540 | 0.801            | 1.686           |
| -38   | -863.3716        | 0.616            | -3.449                   | -2.495                  | 3.551 | 0.786            | 1.696           |
| -39   | -863.3722        | 0.987            | -3.469                   | -2.522                  | 3.564 | 0.775            | 1.703           |
| -40   | -863.3728        | 1.381            | -3.489                   | -2.549                  | 3.578 | 0.767            | 1.709           |
| -45   | -863.3763        | 3.573            | 0.000                    | 0.000                   | 3.655 | 0.744            | 1.724           |
| -50   | -863.3802        | 6.005            | -3.689                   | -2.664                  | 3.734 | 0.727            | 1.739           |
| -55   | -863.3844        | 8.615            | -3.798                   | -2.597                  | 3.816 | 0.720            | 1.745           |
| -60   | -863.3888        | 11.398           | -3.914                   | -2.530                  | 3.901 | 0.717            | 1.751           |
| -65   | -863.3935        | 14.374           | -4.038                   | -2.473                  | 3.992 | 0.723            | 1.750           |
| -70   | -863.3986        | 17.566           | -4.171                   | -2.426                  | 4.090 | 0.728            | 1.748           |
| -75   | -863.4041        | 20.998           | -4.312                   | -2.388                  | 4.197 | 0.737            | 1.744           |
| -80   | -863.4100        | 24.682           | -4.460                   | -2.358                  | 4.313 | 0.749            | 1.737           |
| -85   | -863.4163        | 28.621           | -4.615                   | -2.336                  | 4.439 | 0.764            | 1.728           |
| -90   | -863.4229        | 32.808           | -4.775                   | -2.318                  | 4.575 | 0.763            | 1.738           |
| -95   | -863.4300        | 37.231           | -4.939                   | -2.305                  | 4.720 | 0.780            | 1.727           |
| -100  | -863.4374        | 41.875           | -5.107                   | -2.296                  | 4.874 | 0.799            | 1.715           |

**Table S6.** Dipole moment ( $\mu_0$ , au), Static First Hyperpolarizabilities ( $\beta_0$ , au) of  $\text{Li}_3\text{N}_3\text{Be}(n)$  and  $\text{Li}_3\text{N}_3\text{Ca}(n)$  under OEEF ( $F_z \times 10^{-4}$ ) at MP2/6-311+G(3df) level

|                                     | $\mu_0$ | $\mu_z$ | $\beta_{zzz}$ | $\beta_0$ |                                     | $\mu_0$ | $\mu_z$ | $\beta_{zzz}$ | $\beta_0$ |
|-------------------------------------|---------|---------|---------------|-----------|-------------------------------------|---------|---------|---------------|-----------|
| $\text{Li}_3\text{N}_3\text{Be}(n)$ |         |         |               |           | $\text{Li}_3\text{N}_3\text{Ca}(n)$ |         |         |               |           |
| n = 0                               | 2.909   | 2.909   | 138638        | 96564     | n = 0                               | 1.488   | -1.488  | -324610       | 237929    |
| n = 5                               | 2.943   | 2.943   | 138638        | 96564     | n = 5                               | 1.340   | -1.340  | -304922       | 224170    |
| n = 10                              | 2.937   | 2.937   | 138638        | 96564     | n = 10                              | 1.126   | -1.126  | -290181       | 213858    |
| n = 15                              | 2.879   | 2.879   | 138252        | 96319     | n = 15                              | 0.825   | -0.825  | -287717       | 212351    |
| n = 20                              | 2.622   | 2.622   | 107014        | 73178     | n = 20                              | 0.384   | -0.384  | -371869       | 272203    |
| n = 25                              | 2.499   | 2.499   | 102324        | 69717     | n = 25                              | 0.294   | 0.294   | -389129       | 284344    |
| n = 30                              | 2.335   | 2.335   | 100846        | 68670     | n = 30                              | 1.488   | 1.488   | -441255       | 320735    |
| n = 35                              | 2.093   | 2.093   | 105360        | 72163     | n = 31                              | 1.819   | 1.819   | -473826       | 343239    |
| n = 40                              | 1.685   | 1.685   | 120018        | 83423     | n = 32                              | 2.225   | 2.225   | -510178       | 368075    |
| n = 41                              | 1.561   | 1.561   | 124926        | 87203     | n = 33                              | 2.723   | 2.723   | -544936       | 391496    |
| n = 42                              | 1.345   | 1.345   | 137060        | 96550     | n = 34                              | 3.300   | 3.300   | -574206       | 410915    |
| n = 43                              | 1.155   | 1.155   | 144485        | 102289    | n = 35                              | 3.957   | 3.957   | -595203       | 424607    |
| n = 44                              | 0.922   | 0.922   | 153086        | 108959    | n = 36                              | 4.627   | 4.627   | -610089       | 434184    |
| n = 45                              | 3.581   | -3.581  | 201192        | 161299    | n = 37                              | 5.234   | 5.234   | -621183       | 441222    |
| n = 50                              | 4.044   | -4.044  | 180312        | 148598    | n = 38                              | 5.724   | 5.724   | -646051       | 456615    |
| n = 55                              | 4.361   | -4.361  | 170224        | 142447    | n = 39                              | 6.114   | 6.114   | -652582       | 460537    |
| n = 60                              | 4.618   | -4.618  | 167086        | 140527    | n = 40                              | 6.434   | 6.434   | -653386       | 460998    |
| n = 65                              | 4.856   | -4.856  | 167800        | 120920    | n = 45                              | 7.429   | 7.429   | -650572       | 459331    |
| n = 70                              | 5.087   | -5.087  | -15823        | 9083      | n = 50                              | 8.046   | 8.046   | -644802       | 455850    |
| n = 75                              | 5.326   | -5.326  | 175112        | 145673    | n = 55                              | 8.589   | 8.589   | -636335       | 450653    |
| n = 80                              | 5.582   | -5.582  | 180565        | 149093    | n = 60                              | 9.164   | 9.164   | -625628       | 443970    |
| n = 85                              | 5.865   | -5.865  | 186739        | 153017    | n = 65                              | 9.815   | 9.815   | -599057       | 427029    |
| n = 90                              | 6.179   | -6.179  | 194233        | 157634    | n = 70                              | 10.546  | 10.546  | -584593       | 417623    |
|                                     |         |         |               |           | n = 75                              | 11.335  | 11.335  | -304922       | 224170    |
|                                     |         |         |               |           | n = 80                              | 12.150  | 12.150  | -290181       | 213858    |
|                                     |         |         |               |           | n = 90                              | 13.731  | 13.731  | -287717       | 212351    |
